# Supplementary material for: Catalytic membrane-installed microchannel reactors for one-second allylic arylation
Source: Royal Society of Chemistry journal article supplement (doi:10.1039/b912696a), 2009-01-01
Supplement: b912696a.pdf [file b912696a.pdf]

# Catalytic Membrane-Installed Microchannel Reactors for One-Second Allylic Arylation

Yoichi M. A. Yamada,<sup>a</sup> Toshihiro Watanabe,<sup>ab</sup> Kaoru Torii<sup>b</sup> and Yasuhiro Uozumi<sup>\*ab</sup>

<sup>a</sup> RIKEN, Hirosawa, Wako, Saitama 351-0198, Japan. Fax: +81 48 467 9599; Tel: +81 48 467 8072; E-mail: uo@riken.jp

<sup>b</sup> Institute for Molecular Science and The Graduate School for Advanced Studies, Myodaiji, Okazaki, Aichi 444-8787 Japan. Fax: +81 564 95 5574; Tel: +81 564 59 5571; E-mail: uo@ims.ac.jp

## General

A microchannel reactor having a channel pattern of 100  $\mu\text{m}$  width, 40  $\mu\text{m}$  depth, 40 mm length, and a Y-junction (purchased from the Institute of Microchemical Technology, Co., Ltd., (Kangawa, Japan; URL: <http://www.i-mt.co.jp>) was used, the ends of which were connected via a Teflon tubing to a flow-controlled syringe on a syringe pump.

## Experimental Section

**Preparation of a  $\text{PdCl}_2/\text{PA-TAP}$  Membrane inside a Microchannel ( $\mu$ -device 1).** An ethyl acetate solution of PA-TAP (5.0 mM phosphorus residue; solution A) and an aqueous solution of  $(\text{NH}_4)_2\text{PdCl}_4$  (1.7 mM) (solution B) were charged oppositely into the microchannel (100  $\mu\text{m}$  width, 40  $\mu\text{m}$  depth, 40 mm length) at 50  $^\circ\text{C}$  for 10 min with a flow rate of 20  $\mu\text{L}/\text{min}$ . Two-phase parallel laminar flow was formed under the flowing conditions and a yellowish polymer membrane **1** was precipitated out at the interface between the two parallel flows (thickness of membrane **1** = 1  $\mu\text{m}$ ).

**Preparation of a  $\text{PdCl}_2/\text{polyPy}$  Membrane inside a Microchannel ( $\mu$ -device 2).** An ethyl acetate solution of poly(4-vinylpyridine) (5.0 mM; solution A) and an aqueous solution of  $\text{PdCl}_2$  (1.7 mM) and NaCl (17 mM) (solution B) were charged oppositely into the microchannel (100  $\mu\text{m}$  width, 40  $\mu\text{m}$  depth, 40 mm length) at 25  $^\circ\text{C}$  for 10 min with a flow rate of 20  $\mu\text{L}/\text{min}$ . Two-phase parallel laminar flow was formed under the flowing conditions and a yellowish polymer membrane **2** was precipitated out at the interface between the two parallel flows (thickness of membrane **2** = 10  $\mu\text{m}$ ). IR(ATR)  $\nu$  3476, 1612, 1427, 1221, 1068, 829  $\text{cm}^{-1}$ ; Anal. Calcd for  $[(\text{PdCl}_2)_3(\text{C}_7\text{H}_7\text{N})_6 \cdot \text{CH}_3\text{CO}_2\text{Et}]_n$ : C 44.17%, H 4.03%, N 6.72%. Found: C 44.11%, H 4.15%, N 7.18%.

**Preparation of a  $\text{PdCl}_2/\text{polyviologen}$  Membrane inside a Microchannel ( $\mu$ -device 3).** An *i*-PrOH-EtOAc- $\text{H}_2\text{O}$  (2:1:1) solution of poly(4,4'-bipyridyl-*co*-1,4-bis(bromomethyl)benzene) (1.7 mM; solution A) and an aqueous solution of  $\text{PdCl}_2$  (1.7 mM) and NaCl (17 mM) (solution B) were charged oppositely into the microchannel at 25  $^\circ\text{C}$  for 10 min with a flow rate of 20  $\mu\text{L}/\text{min}$ . Two-phase parallel laminar flow was formed under the flowing conditions, and a yellowish polymer membrane **3** was precipitated out at the interface between the two parallel flows (thickness of membrane **3** = 10  $\mu\text{m}$ ).

## General procedure for the Allylic Arylation Reaction Using a Microchannel Having a Pd Membrane ( $\mu$ -device 1-3)

An *i*-PrOH solution of cinnamyl acetate (5.8 mM; solution A) and an aqueous solution of sodium

tetraphenylborate (58 mM; solution B) were oppositely introduced into the membrane-divided channels at 50 °C with a flow rate of 3.0  $\mu\text{l}/\text{min}$ , and two parallel laminar layers flowed through the channel in 1 second. The resulting organic/aqueous micro stream was collected from the outlet of the channel to afford a quantitative yield of 1,3-diphenyl-1-propene.

5

### Optical Microscopic Images of $\mu$ -Devices 1-3

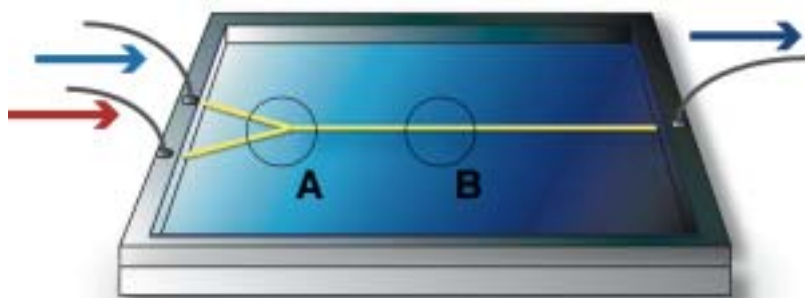

10  **$\mu$ -device 1: [Palladium loading: (ICP-AES analysis) 0.50 mmol/g (1.2 nmol/channel)]**

#### Position A

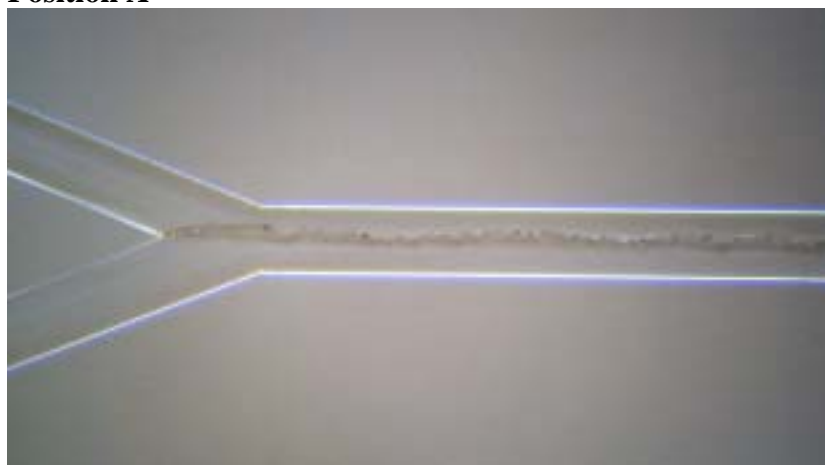

15 **Position B**

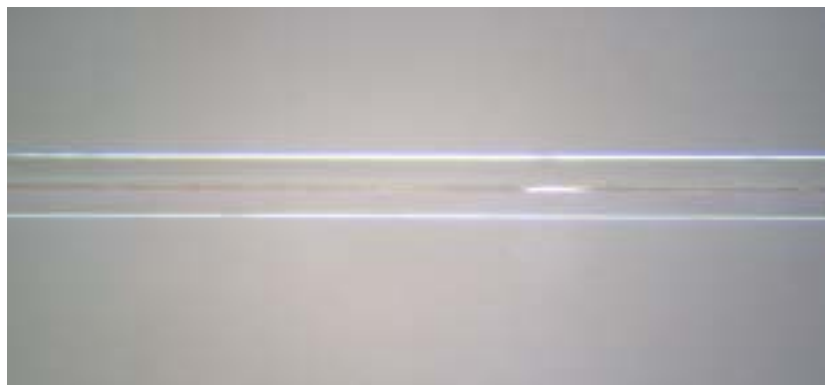

**$\mu$ -device 2**  
**Position A**

5

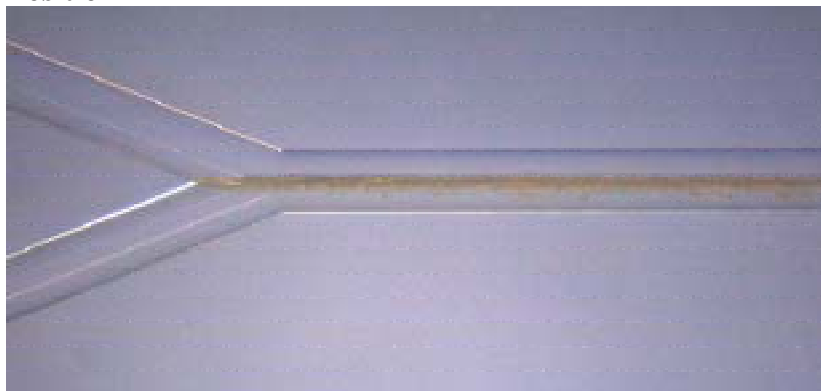

**Position B**

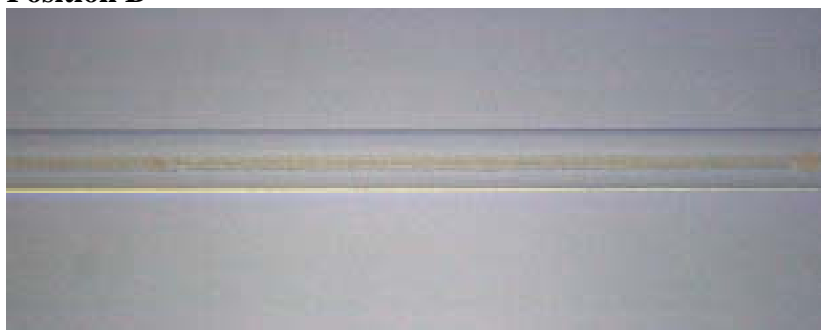

10

**$\mu$ -device 3**  
**Position A**

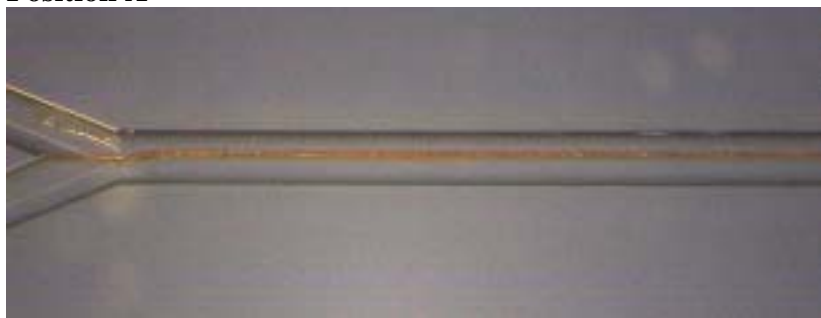

**Position B**

15

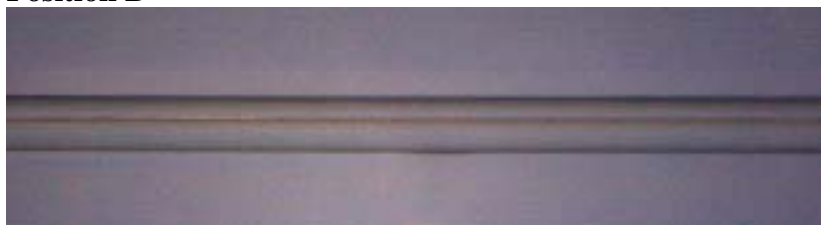

### GC #1

Snapshot at 1 h

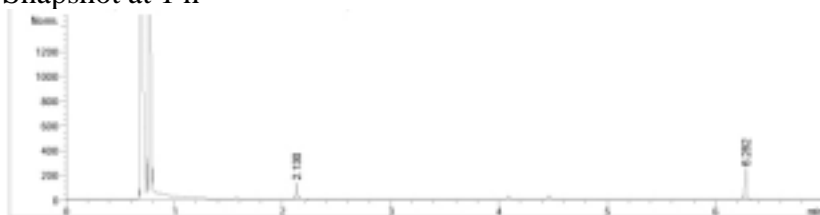

### GC #2

Snapshot at 2 h

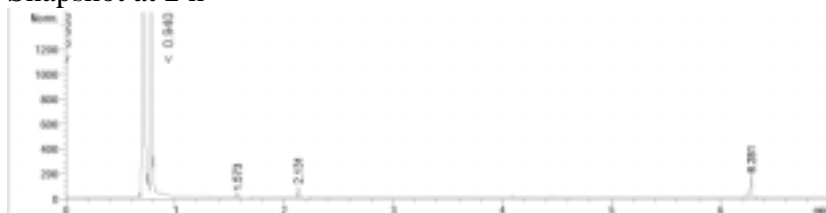

**Figure S-1.** **6a** from **4a** (Entry 1, Table 1): The reaction was monitored by GC in a snapshot manner at 1 h and 2 h (GC #1- #2: 2.1 min: internal standard; 6.3 min: **6a**).

### GC #3

Snapshot at 30 min

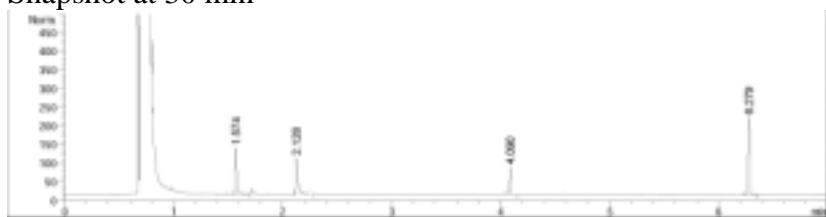

### GC #4

Snapshot at 50 min

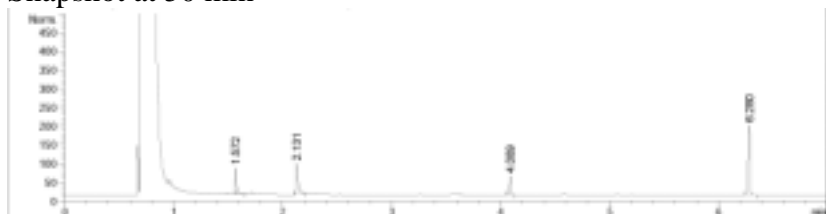

**Figure S-2.** **6a** from **4b** (Entry 5, Table 1): The reaction was monitored by GC in a snapshot manner at 30 min and 50 min (GC #3- #4: 2.1 min: internal standard; 6.3 min: **6a** (4.1 min: a peak derived from NaBPh<sub>4</sub>)).
